# Supplementary material
Source: Royal Society of Chemistry journal article supplement (doi:10.1039/d6dt00099a)
Supplement: d6dt00099a1.pdf [file d6dt00099a1.pdf]

## **Nitro-substituted ruthenium(II) polypyridyl complexes synergise with ATR inhibitors to enhance replication stress in cancer cells**

Yian Chee Gan<sup>1,‡</sup>, Nur Aininie Yusoh<sup>2,‡</sup>, Suet Lin Chia<sup>3,4,5</sup>, Xiaohe Tian<sup>2,\*</sup>, Martin R. Gill<sup>6,\*</sup> and Haslina Ahmad<sup>1,4\*</sup>

<sup>1</sup>Department of Chemistry, Faculty of Science, Universiti Putra Malaysia, 43400 UPM Serdang, Selangor, Malaysia

<sup>2</sup>Department of Radiology, Huaxi MR Research Center (HMRRC), Institute of Radiology and Medical Imaging, West China Hospital of Sichuan University, Sichuan University, Chengdu, Sichuan, China

<sup>3</sup>Department of Microbiology, Faculty of Biotechnology and Biomolecular Science, Universiti Putra Malaysia, 43400 UPM Serdang, Selangor, Malaysia

<sup>4</sup>UPM-MAKNA Cancer Research Laboratory, Institute of Bioscience, Universiti Putra Malaysia, 43400 UPM Serdang, Selangor, Malaysia

<sup>5</sup>Malaysia Genome and Vaccine Institute, National Institutes of Biotechnology Malaysia, Jalan Bangi, 43000 Kajang, Malaysia

<sup>6</sup>Department of Chemistry, Faculty of Science and Engineering, Swansea University, Swansea, UK

Email: [xiaohe.t@wchscu.cn](mailto:xiaohe.t@wchscu.cn), [m.r.gill@swansea.ac.uk](mailto:m.r.gill@swansea.ac.uk) and [haslina\\_ahmad@upm.edu.my](mailto:haslina_ahmad@upm.edu.my)

<sup>‡</sup>These authors contributed equally to the work.

### **Supplementary Methods:**

#### **Singlet oxygen detection (SOSG)**

Singlet oxygen generation was assessed using SOSG probe. SOSG (5  $\mu$ M) was prepared in PBS and mixed with complexes **1-3** (10  $\mu$ M). Fluorescence was recorded on a microplate reader at  $\lambda_{\text{ex}} = 504$  nm and  $\lambda_{\text{em}} = 525$  nm at 0-30 min. Background fluorescence from SOSG-only and buffer-only controls was subtracted. A singlet oxygen-generating control (rose bengal, 10  $\mu$ M)

was included under identical conditions with white-light irradiation to confirm probe responsiveness.

### Supplementary Tables:

**Table S1.** Fitted biexponential lifetime parameters ( $\tau_1$ ,  $\tau_2$ ) for complexes **1-3** recorded in acetonitrile ( $\lambda_{\text{ex}} = 450$  nm).

| Compound | $\lambda_{\text{ex. (max.)}}$ (nm) | $\lambda_{\text{em. (max.)}}$ (nm) | $\tau_1$ /ns (%) | $\tau_2$ /ns (%) |
|----------|------------------------------------|------------------------------------|------------------|------------------|
| <b>1</b> | 446                                | 605                                | 171 (82)         | 607 (18)         |
| <b>2</b> | 450                                | 605                                | 191 (83)         | 614 (17)         |
| <b>3</b> | 456                                | 600                                | 160 (76)         | 519 (24)         |

**Table S2.** DNA binding affinity parameters of complexes **1-3** with CT-DNA, determined from UV-Visible titration experiments.  $K_b$  = DNA binding constant.

| Compound                                                             | DNA $K_b$ ( $M^{-1}$ ) |
|----------------------------------------------------------------------|------------------------|
| [Ru(dppz) <sub>2</sub> ( <i>o</i> -NPIP)] <sup>2+</sup> ( <b>1</b> ) | $8.6 \times 10^6$      |
| [Ru(dppz) <sub>2</sub> ( <i>m</i> -NPIP)] <sup>2+</sup> ( <b>2</b> ) | $1.0 \times 10^6$      |
| [Ru(dppz) <sub>2</sub> ( <i>p</i> -NPIP)] <sup>2+</sup> ( <b>3</b> ) | $2.5 \times 10^6$      |

**Table S3.** Stern-Volmer quenching parameters obtained from EB-DNA competitive fluorescence titration of the Ru(II) complexes. The Stern-Volmer constants ( $K_{SV}$ ) were derived from the slope of the linear plots of  $I_0/I = 1 + K_{SV}[Q]$ , and the correlation coefficients ( $R^2$ ) represent the goodness of fit. All complexes exhibited linear quenching behaviour, with efficiencies following the order **3 > 2 > 1**.

| Compound | DNA/EB ratio | $K_{SV}$ ( $\times 10^5 M^{-1}$ ) | $R^2$ | Observation                                             |
|----------|--------------|-----------------------------------|-------|---------------------------------------------------------|
| <b>1</b> | 4.6          | 1.52                              | 0.991 | Linear Stern-Volmer plot; moderate quenching efficiency |
| <b>2</b> | 4.3          | 1.58                              | 0.996 | Linear Stern-Volmer plot; stronger quenching than RuO   |

|          |     |      |       |                                                          |
|----------|-----|------|-------|----------------------------------------------------------|
| <b>3</b> | 4.9 | 2.11 | 0.989 | Linear Stern-Volmer plot; most efficient EB displacement |
|----------|-----|------|-------|----------------------------------------------------------|

**Table S4.** 72 h half-maximal inhibitory concentrations (IC<sub>50</sub>) of complexes **1-3** and parent molecule Ru-PIP determined by MTT assay. Data are presented as mean ± SD.

| Compound      | 72 h IC <sub>50</sub> (μM) |              |              |      |
|---------------|----------------------------|--------------|--------------|------|
|               | MCF7                       | A549         | HeLa         | MRC5 |
| <b>1</b>      | 37.72 ± 1.41               | 43.58 ± 0.73 | 40.72 ± 2.04 | >100 |
| <b>2</b>      | 42.27 ± 2.11               | 41.66 ± 0.67 | 43.76 ± 0.87 | >100 |
| <b>3</b>      | 37.42 ± 0.76               | 39.05 ± 1.42 | 43.49 ± 1.12 | >100 |
| <b>Ru-PIP</b> | 28.04 ± 1.57               | 30.08 ± 0.24 | 41.56 ± 1.79 | >100 |

### Supplementary Figures:

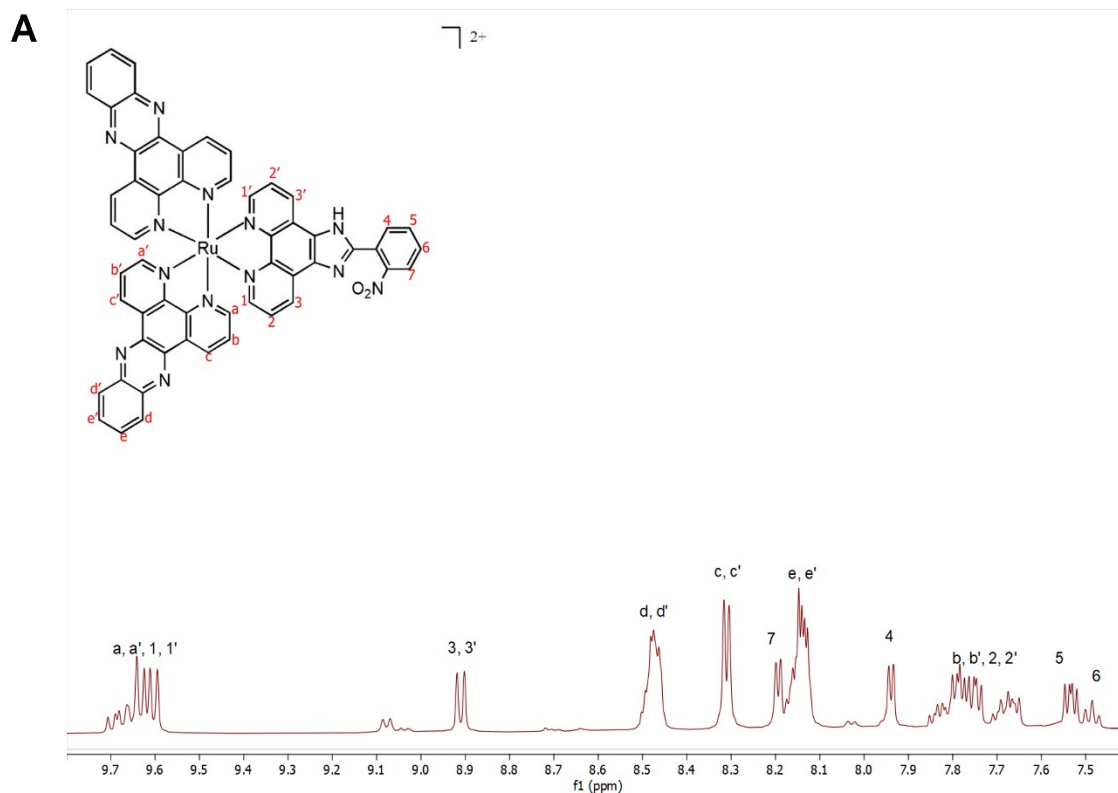

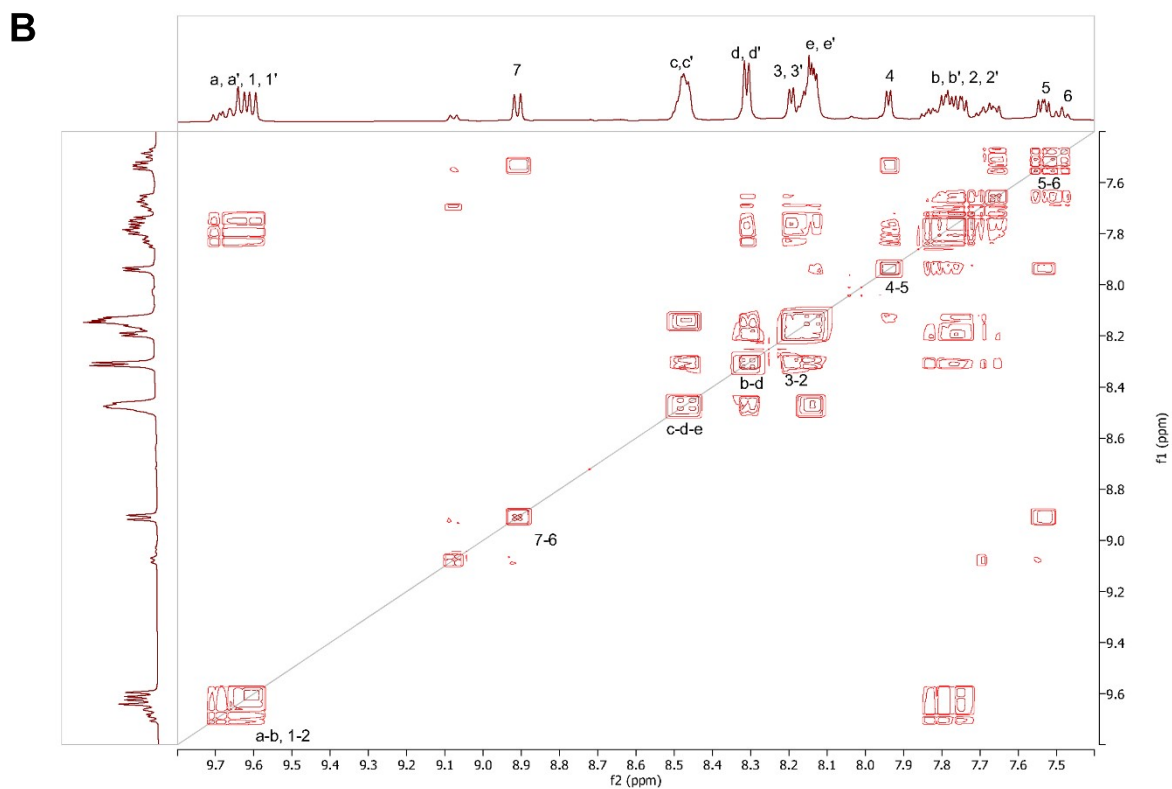

**Figure S1.** (A)  $^1\text{H}$  NMR spectrum and (B) corresponding 2D  $^1\text{H}$ - $^1\text{H}$  COSY spectrum of **1** recorded in  $\text{CD}_3\text{CN}$  on a 500 MHz NMR spectrometer at 298 K.

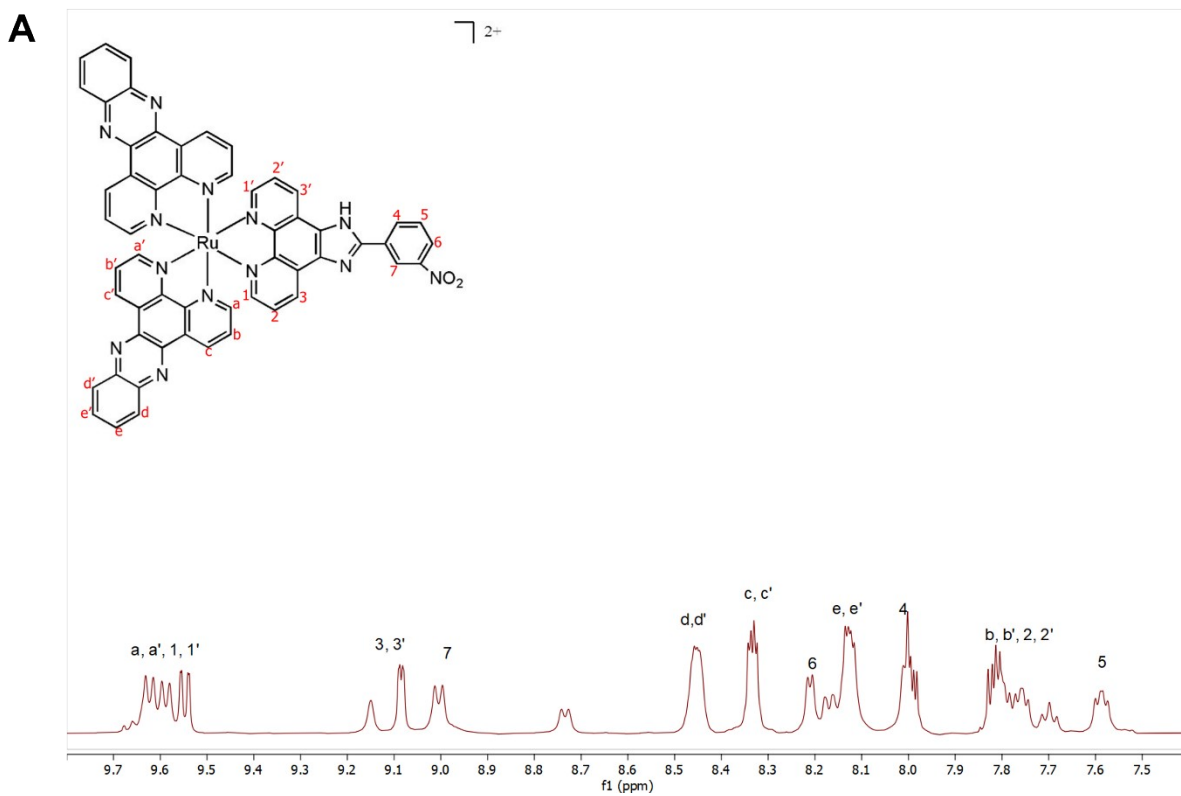

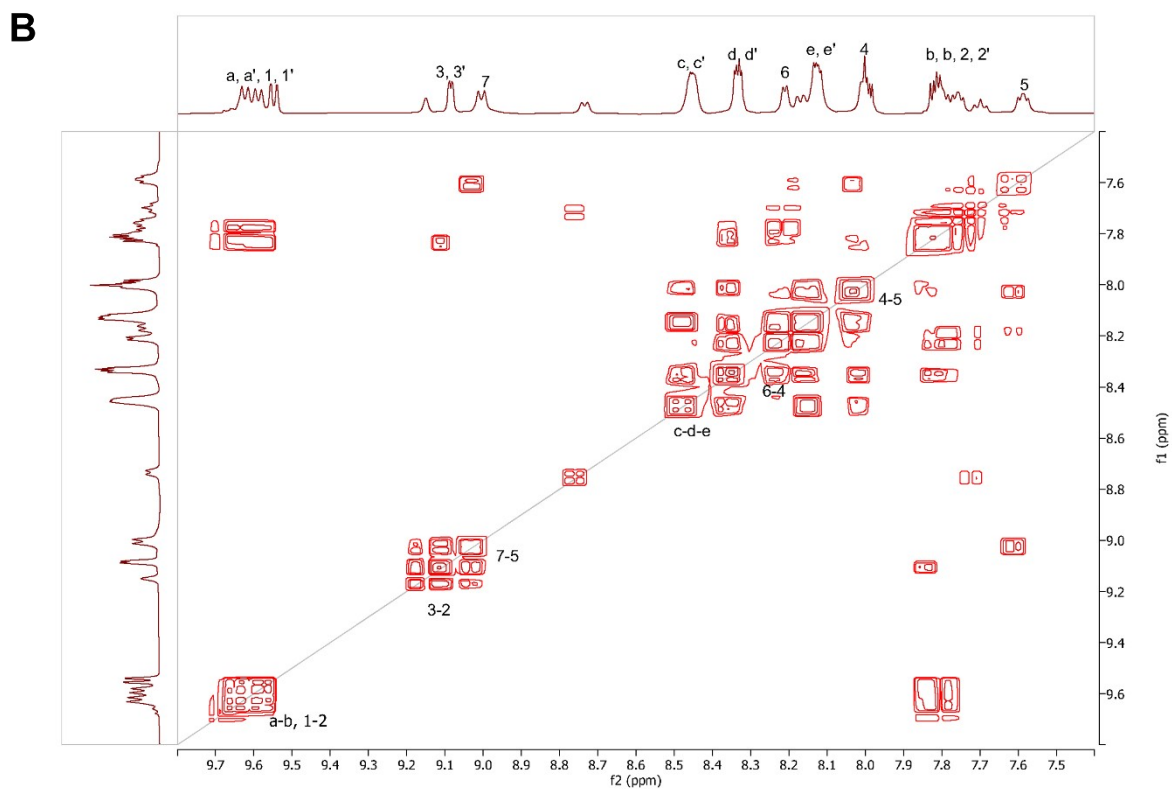

**Figure S2.** (A)  $^1\text{H}$  NMR spectrum and (B) corresponding 2D  $^1\text{H}$ - $^1\text{H}$  COSY spectrum of **2** recorded in  $\text{CD}_3\text{CN}$  on a 500 MHz NMR spectrometer at 298 K.

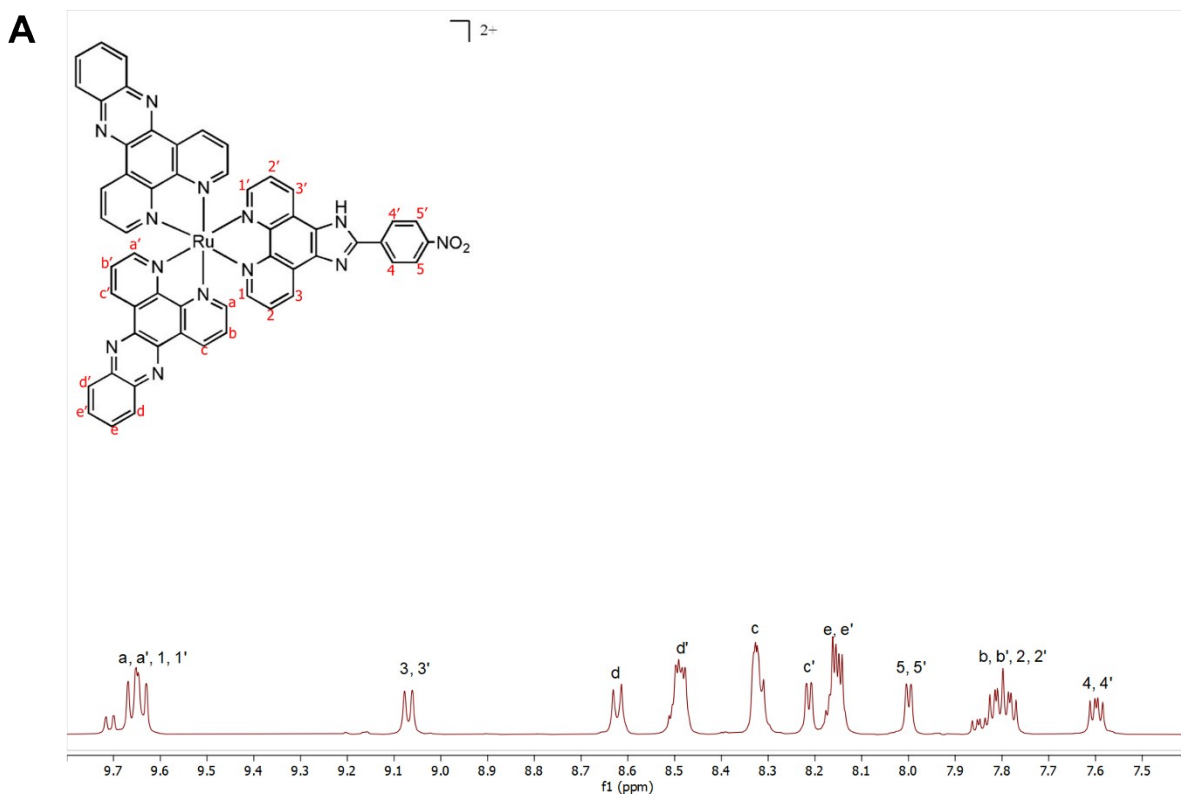

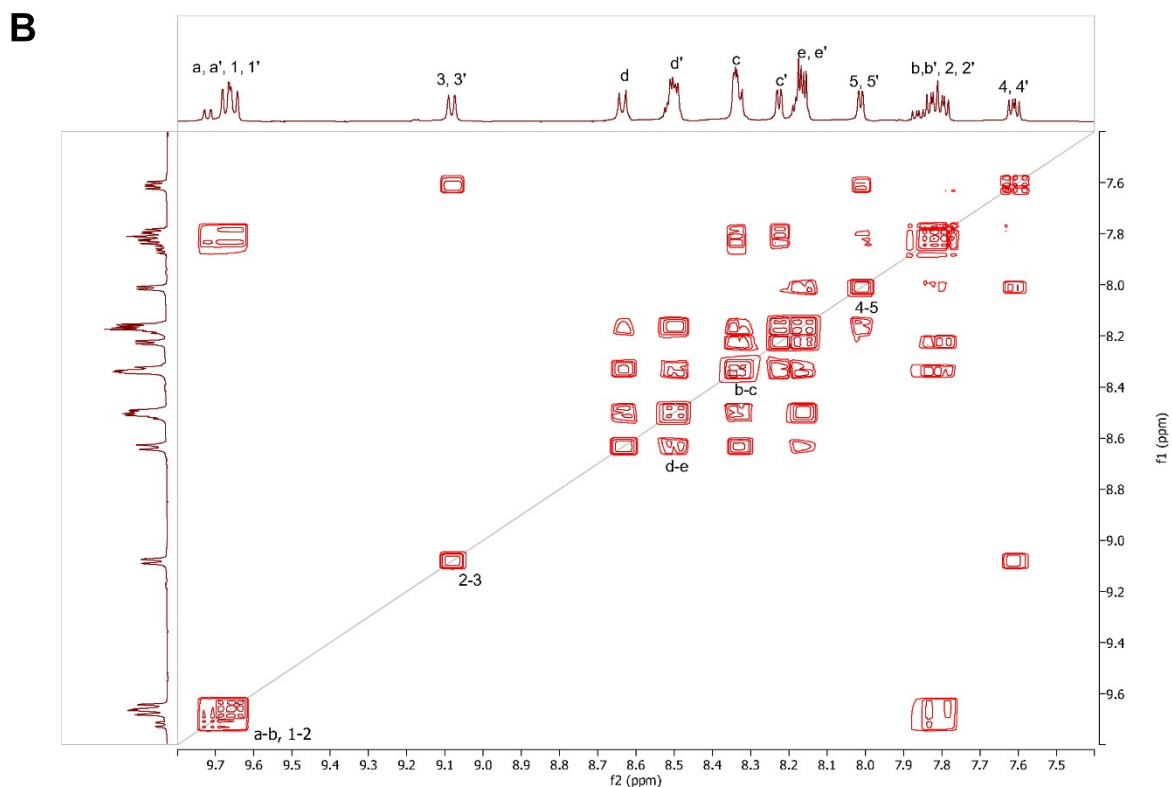

**Figure S3.** (A)  $^1\text{H}$  NMR spectrum and (B) corresponding 2D  $^1\text{H}$ - $^1\text{H}$  COSY spectrum of **3** recorded in  $\text{CD}_3\text{CN}$  on a 500 MHz NMR spectrometer at 298 K.

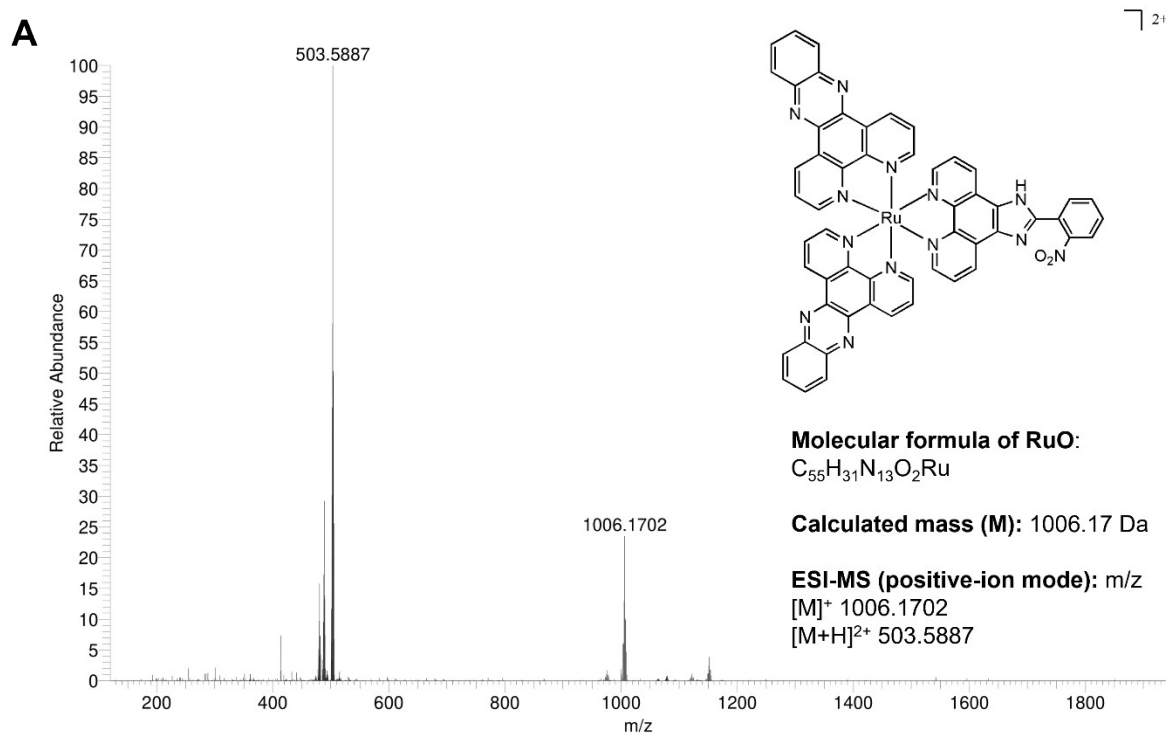

**Figure S4.** ESI-MS spectrum of **1**.

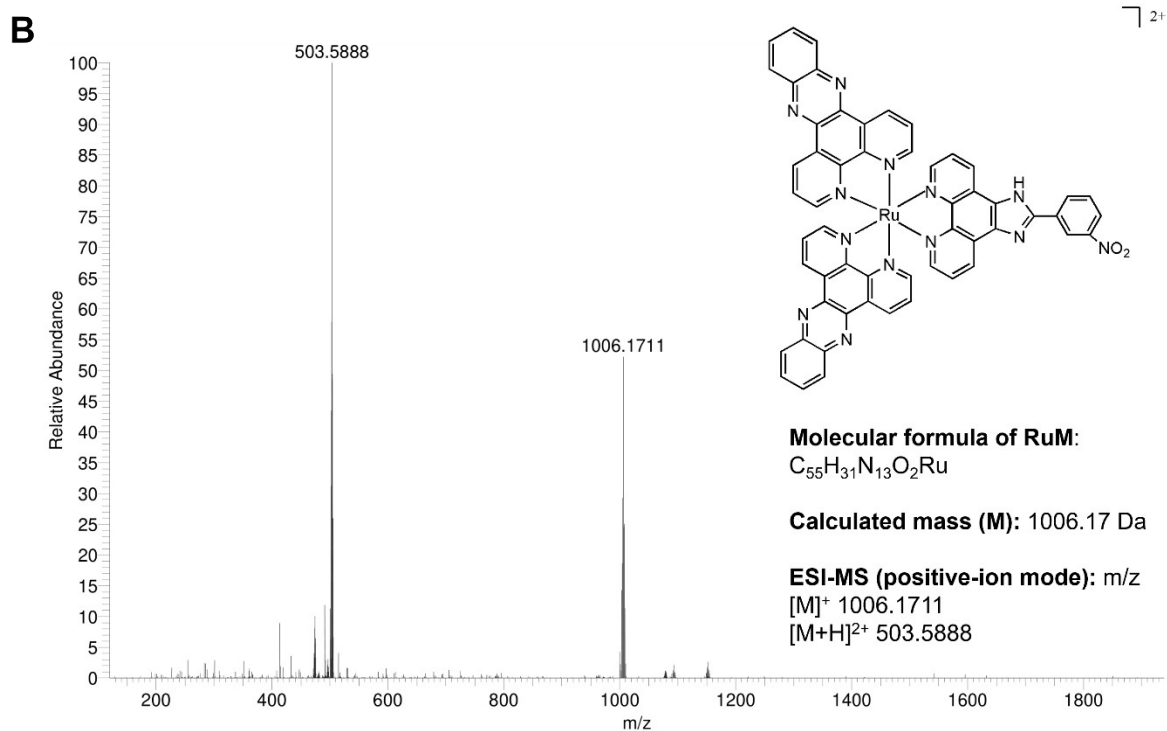

**Figure S5.** ESI-MS spectrum of **2**.

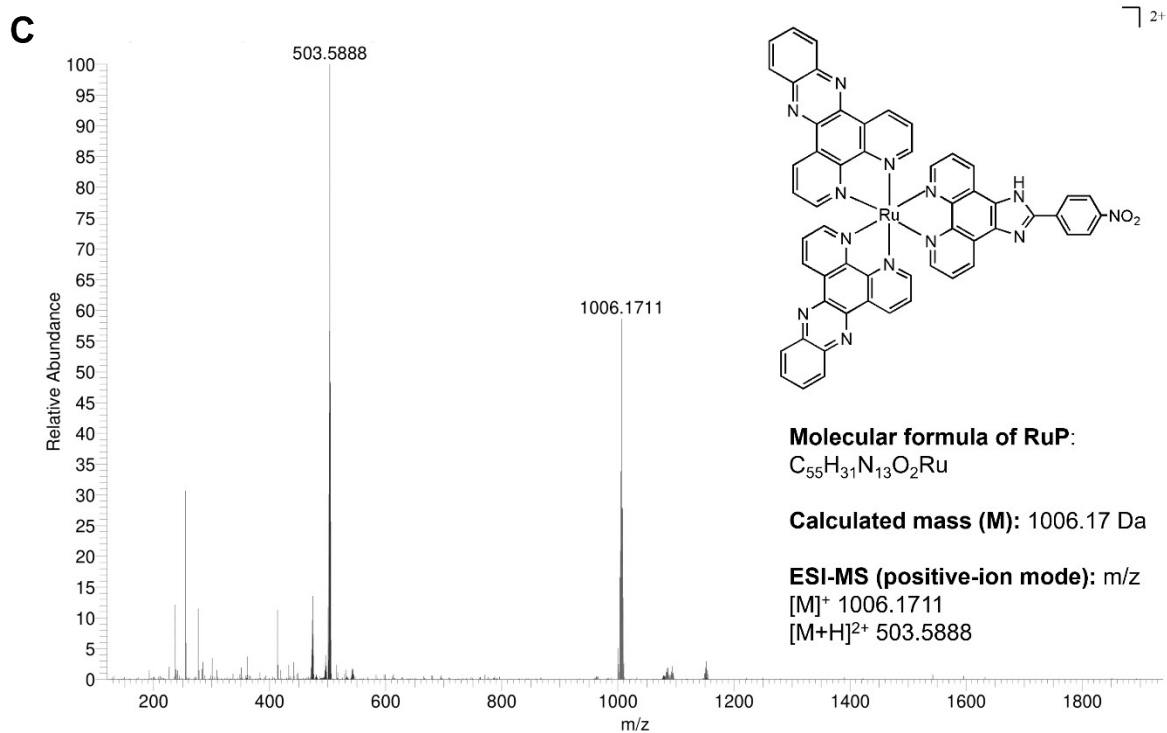

**Figure S6.** ESI-MS spectrum of **3**.

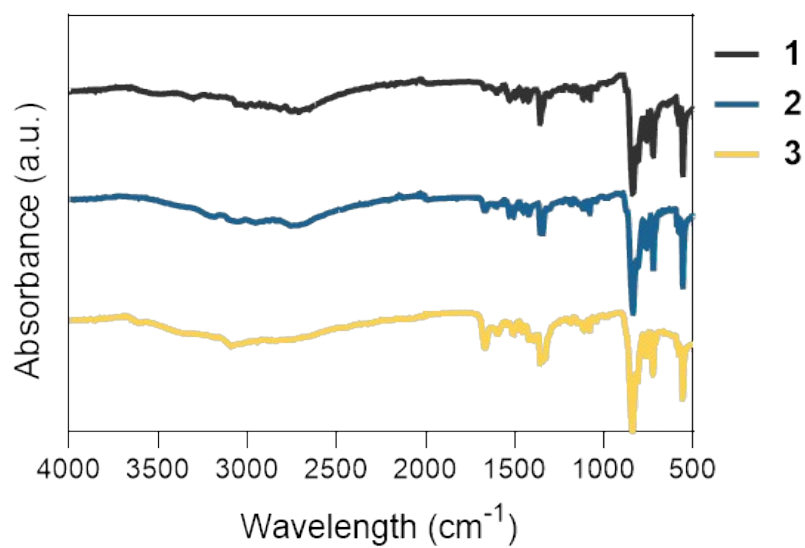

**Figure S7.** FT-IR spectra of **1-3**.

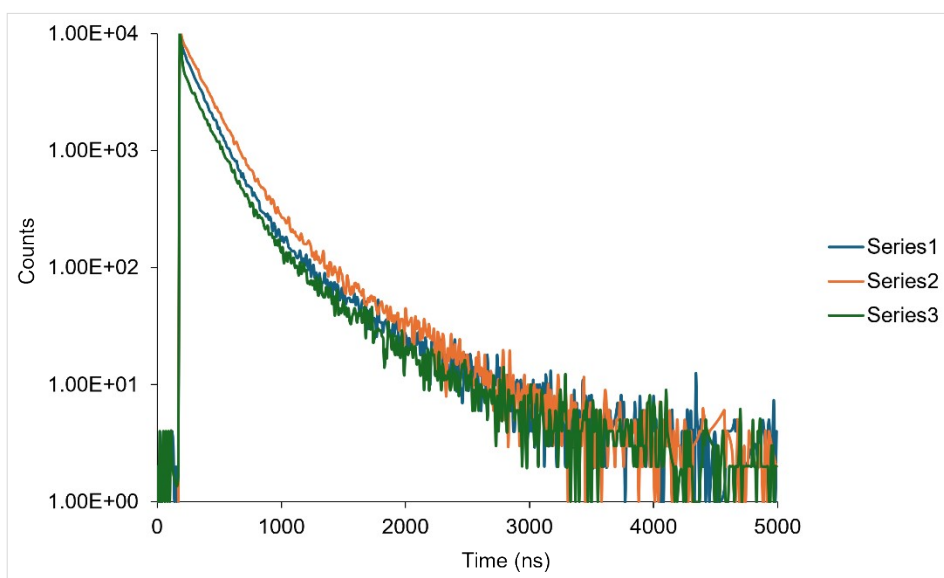

**Figure S8.** Lifetime decay profiles of complexes **1-3** recorded in acetonitrile ( $\lambda_{\text{ex}} = 450 \text{ nm}$ ). All complexes exhibit biexponential  $^3\text{MLCT}$  decay behaviour.

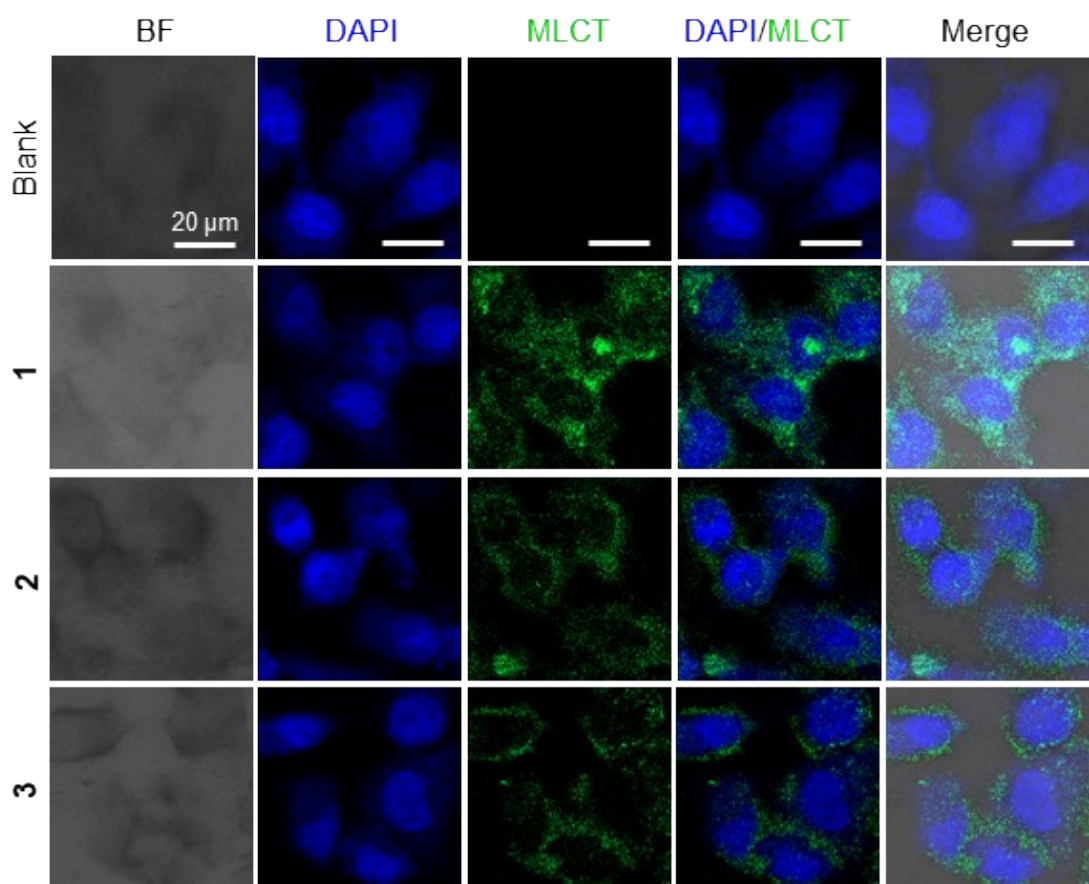

**Figure S9.** Confocal fluorescence images of HeLa cells treated with complexes **1-3** (100  $\mu\text{M}$ , 1 h). Complexes were excited at 488 nm, and emission was collected between 600-750 nm. Nuclei were counterstained with DAPI. Scale bars = 20  $\mu\text{m}$ .

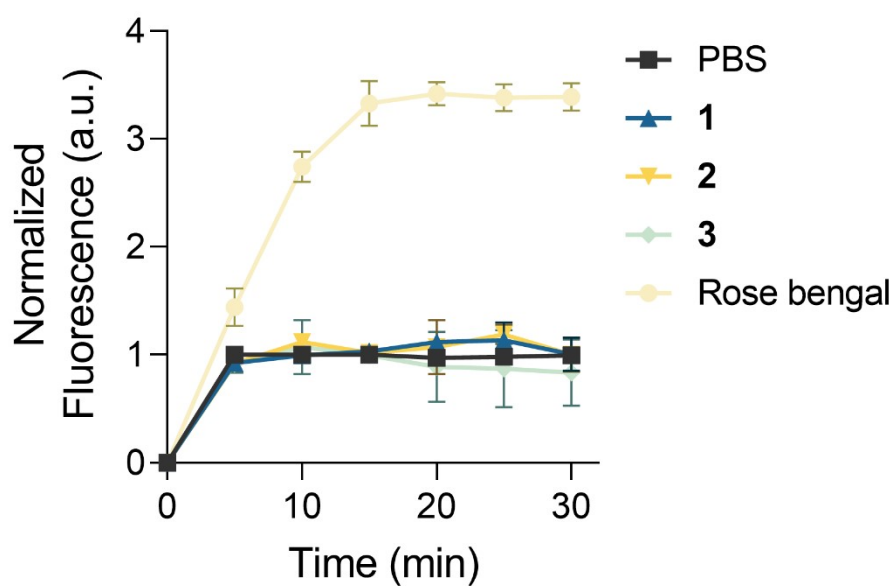

**Figure S10.** Singlet oxygen ( $^1\text{O}_2$ ) generation using SOSG.

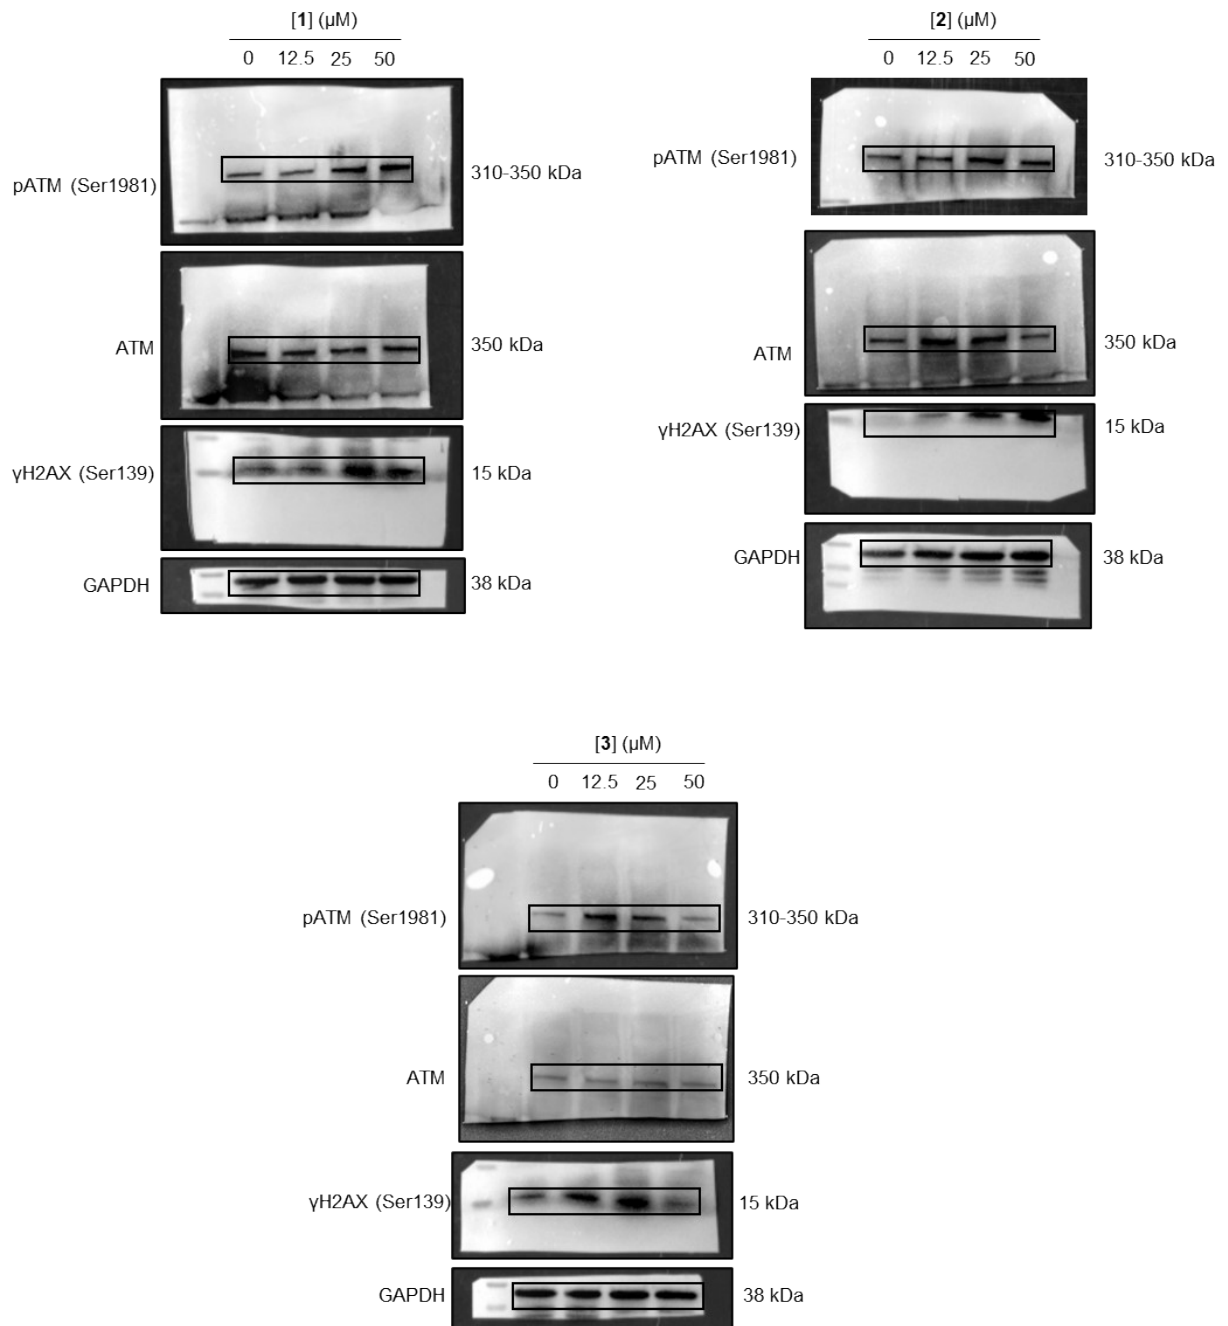

**Figure S11.** Uncropped blots for Fig. 4c.

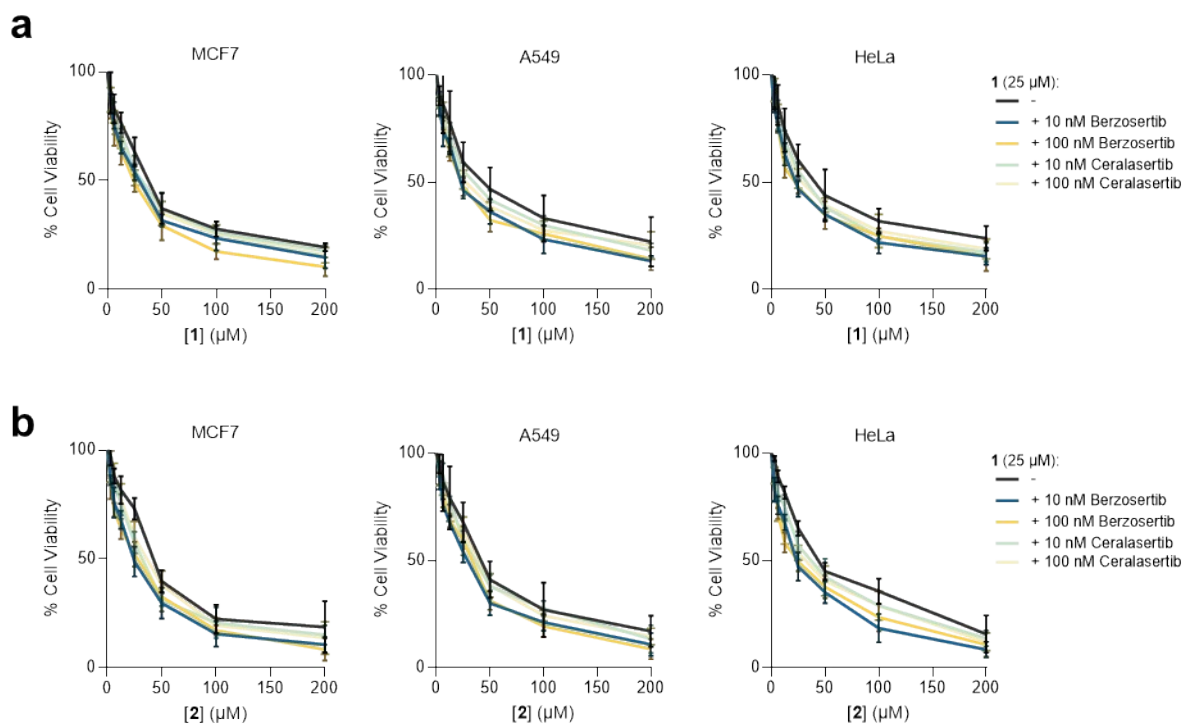

**Figure S12.** Cell viability of MCF7, A549 and HeLa cells treated with complexes (a) **1** and (b) **2** in combination with ceralasertib (0.01 μM) or berzosertib (0.01 μM) for 72 h, assessed by MTT assay. Data represent mean ± SD from three independent experiments.

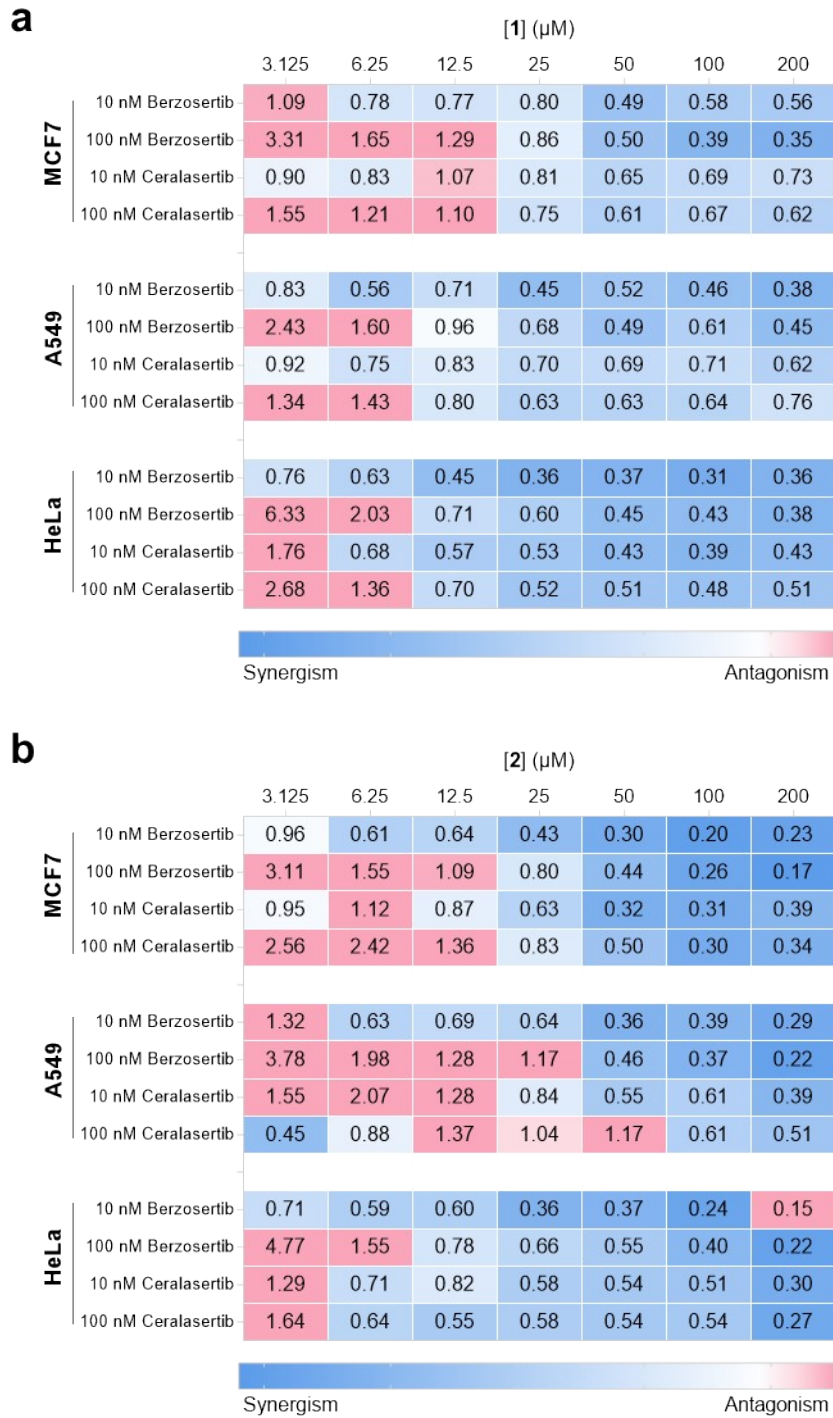

**Figure S13.** Combination indices for complexes (a) **1** and (b) **2** in combination with ATRi calculated using the Chou-Talalay method. CI < 1 = synergism and CI > 1 antagonism.

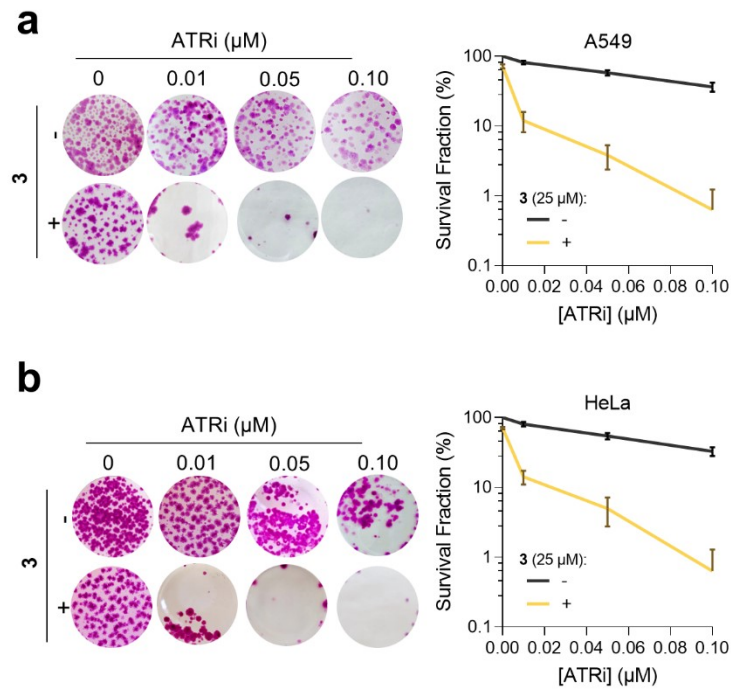

**Figure S14.** Clonogenic survival of A549 and HeLa cells after treated with concentration gradient of ATRi in the presence and absence of **3** ( $25 \mu\text{M}$ ). Data represent mean  $\pm$  SD from three independent experiments.

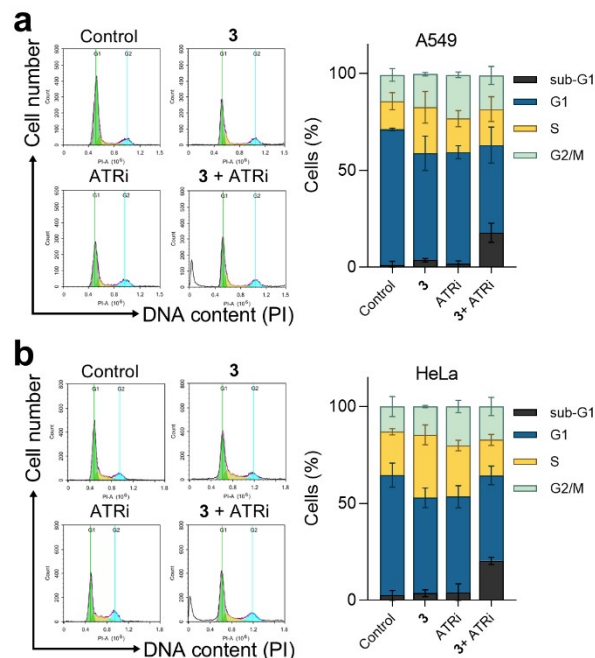

**Figure S15.** Cell-cycle distribution of (a) A549 and (b) HeLa cells treated for 72 h with complex **3** ( $25 \mu\text{M}$ ) in combination with ATRi berzosertib ( $0.01 \mu\text{M}$ ). Data represent mean  $\pm$  SD from three independent experiments.

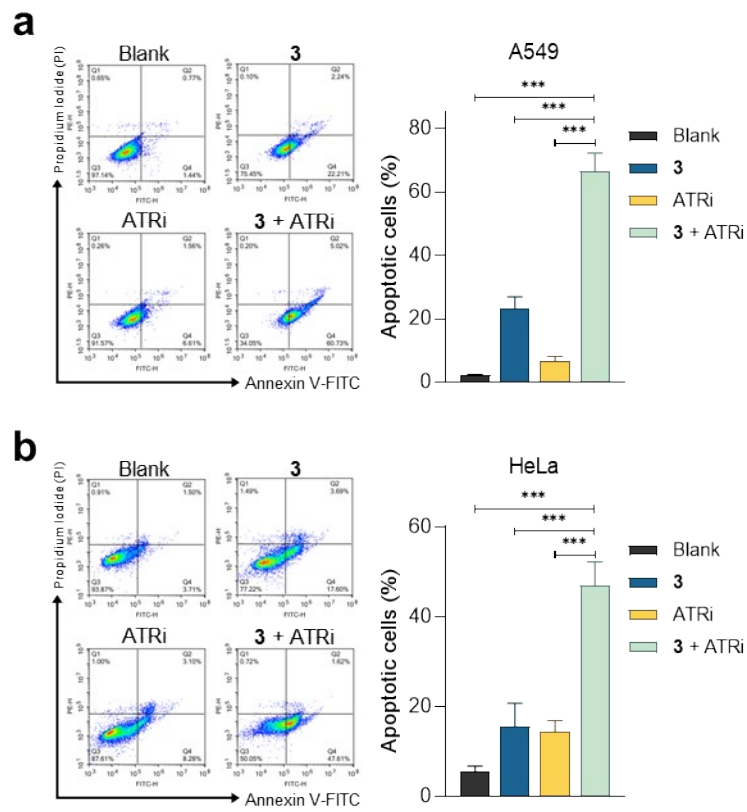

**Figure S16.** Annexin V-FITC/PI flow cytometry analysis of apoptosis in (a) A549 and (b) HeLa cells treated with complex **3** (25  $\mu$ M), berzosertib (0.01  $\mu$ M), or the combination for 72 h. Data represent mean  $\pm$  SD from three independent experiments. \*\*\* $P < 0.001$  by ANOVA.

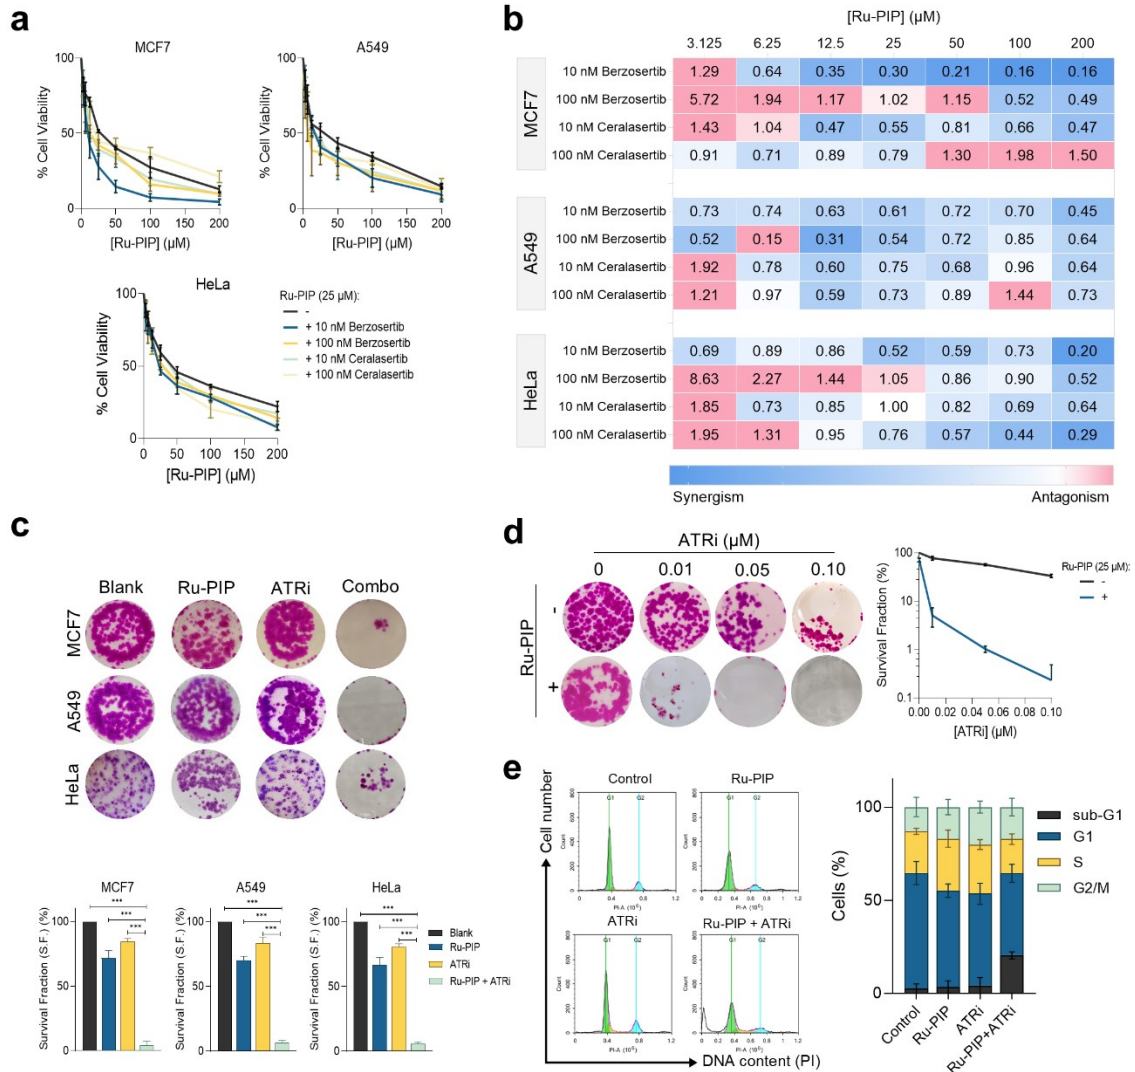

**Fig. S17.** Synergistic activity of Ru-PIP with ATR inhibitors. a) Cell viability of MCF7, A549 and HeLa cells treated with Ru-PIP in combination with ceralasertib (0.01  $\mu\text{M}$ ) or berzosertib (0.01  $\mu\text{M}$ ) for 72 h, assessed by MTT assay. Data represent mean  $\pm$  SD from three independent experiments. b) Combination indices calculated using the Chou-Talalay method. CI < 1 = synergism and CI > 1 antagonism. c) Clonogenic survival of cells treated for 72 h with Ru-PIP (25  $\mu\text{M}$ ) in combination with berzosertib (0.01  $\mu\text{M}$ ). d) Clonogenic survival of MCF7 cells after treatment with a concentration gradient of ATR inhibitor in the presence and absence of Ru-PIP (25  $\mu\text{M}$ ). e) Cell-cycle distribution of MCF7 cells treated for 72 h with Ru-PIP (25  $\mu\text{M}$ ) in combination with berzosertib (0.01  $\mu\text{M}$ ). Data represent mean  $\pm$  SD from three independent experiments. \*\*\*P < 0.001 by ANOVA.

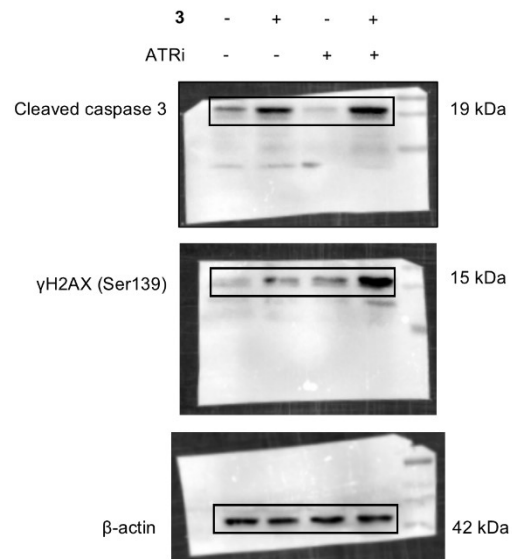

**Figure S18.** Uncropped blots for Fig. 6c.

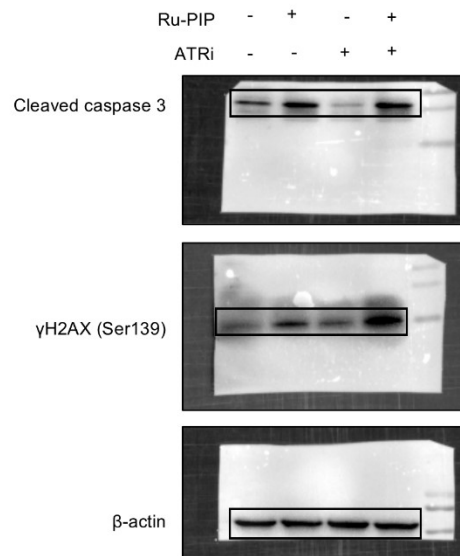

**Figure S19.** Uncropped blots for Fig. S18c.
